# Supplementary material
Source: MDPI journal article supplement (https://www.mdpi.com/2227-7102/13/3/242)
Supplement: s1 [file s1]

Archive with 2 entries (2 files):
- Edu Sci Supplemental Materials Dec 18 22.pdf
- __MACOSX/._Edu Sci Supplemental Materials Dec 18 22.pdf
